# Supplementary material for: CAU-3: A new family of porous MOFs with a novel Al-based brick: [Al2(OCH3)4(O2C-X-CO2)] (X = aryl)
Source: Royal Society of Chemistry journal article supplement (doi:10.1039/c2dt12005d), 2012-01-01
Supplement: c2dt12005d.pdf [file c2dt12005d.pdf]

## Supporting Information

### CAU-3: A new family of porous MOFs with a novel Al-based

### brick: $[\text{Al}_2(\text{OCH}_3)_4(\text{O}_2\text{C}-\text{X}-\text{CO}_2)]$ (X=aryl)

*Helge Reinsch, Mark Feyand, Tim Ahnfeldt and Norbert Stock*

Institute of Inorganic Chemistry, Christian-Albrechts-Universität, Max-Eyth-Straße 2, 24118  
Kiel, Germany

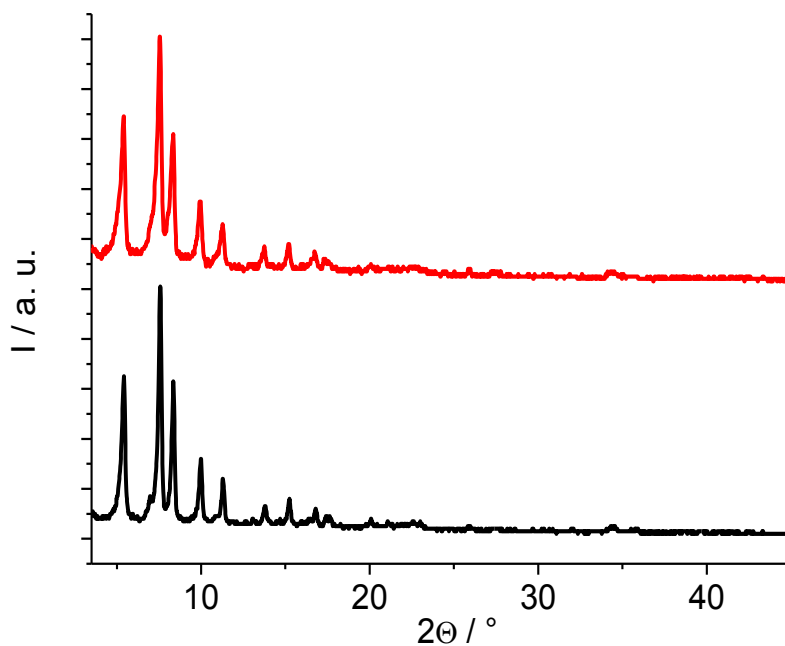

Figure S1: Powder pattern of an “as”-sample of CAU-3-BDC (black), and a sample after activation procedure and sorption measurement (red).

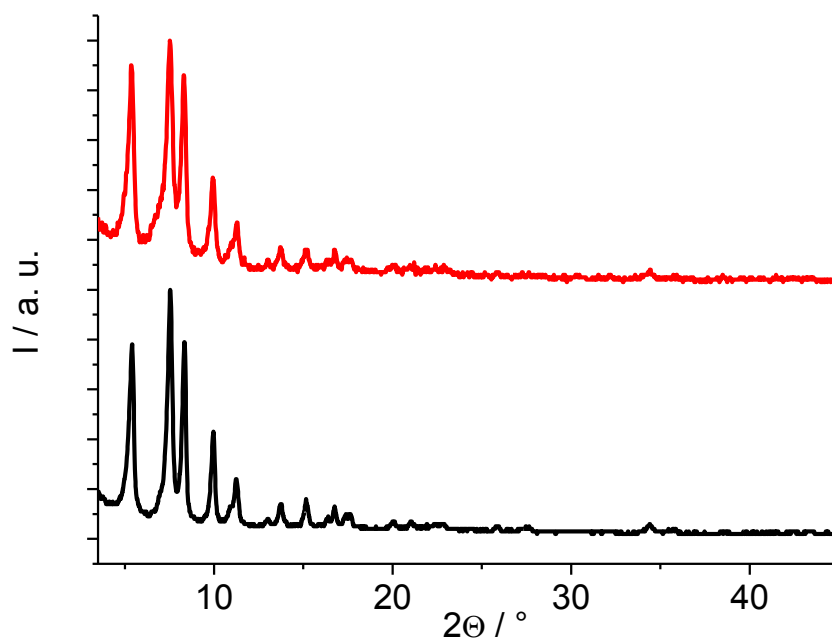

Figure S2: Powder pattern of an “as”-sample of CAU-3-BDC-NH<sub>2</sub> (black), and a sample after activation procedure and sorption measurement (red).

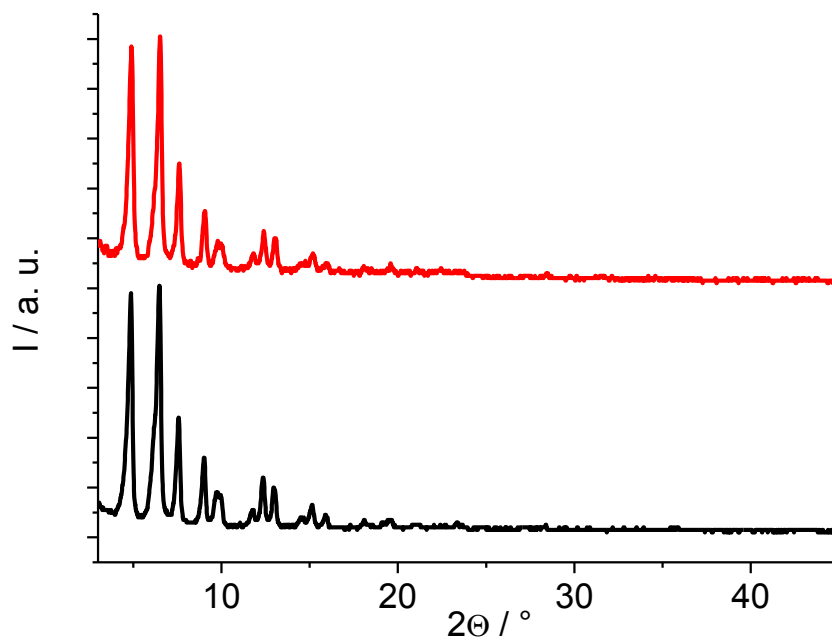

Figure S3: Powder pattern of an “as”-sample of CAU-3-NDC (black), and a sample after activation procedure and sorption measurement (red).

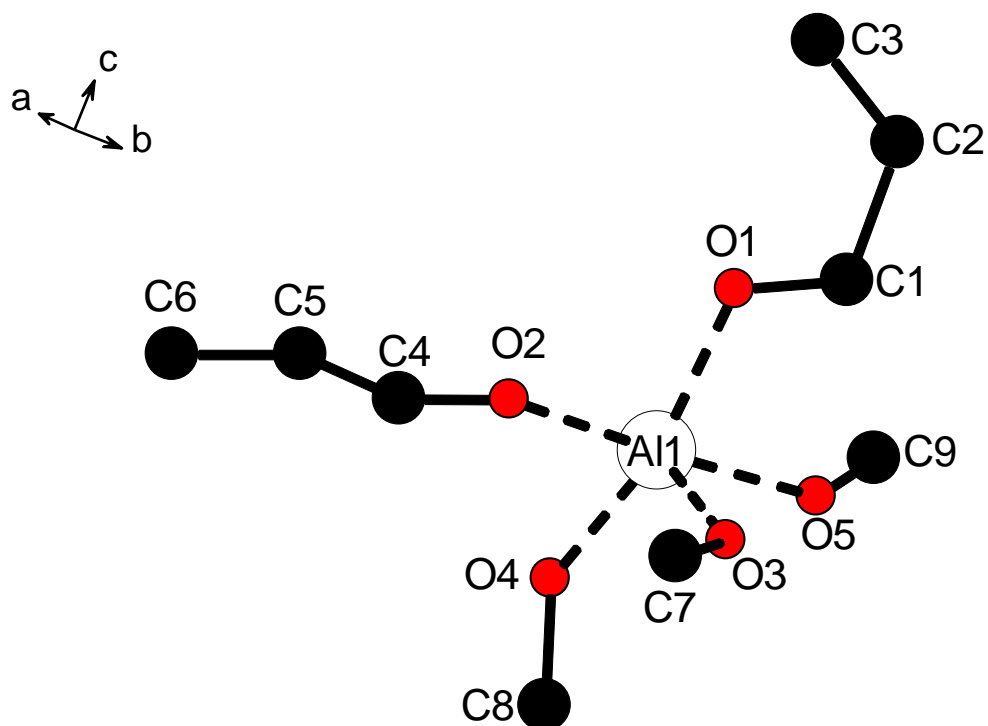

Figure S4: Asymmetric unit of CAU-3-BDC with numbering scheme.

Table S1: Selected bond lengths in CAU-3-BDC [Å].

| <i>Atom 1</i> | <i>Atom 2</i> | <i>d / Å</i> |           |    |         |
|---------------|---------------|--------------|-----------|----|---------|
| <b>Al1</b>    | O1            | 1.96(1)      | <b>C2</b> | C3 | 1.39(1) |
|               | O2            | 1.98(2)      | <b>O2</b> | C4 | 1.23(1) |
|               | O3            | 1.92(1)      | <b>C5</b> | C6 | 1.37(1) |
|               | O4            | 1.83(1)      | <b>O3</b> | C7 | 1.47(3) |
|               | O5            | 1.89(2)      | <b>O4</b> | C8 | 1.46(2) |
| <b>O1</b>     | C1            | 1.22(2)      | <b>O5</b> | C9 | 1.51(3) |
| <b>C1</b>     | C2            | 1.54(1)      | <b>C9</b> | O5 | 1.51(3) |

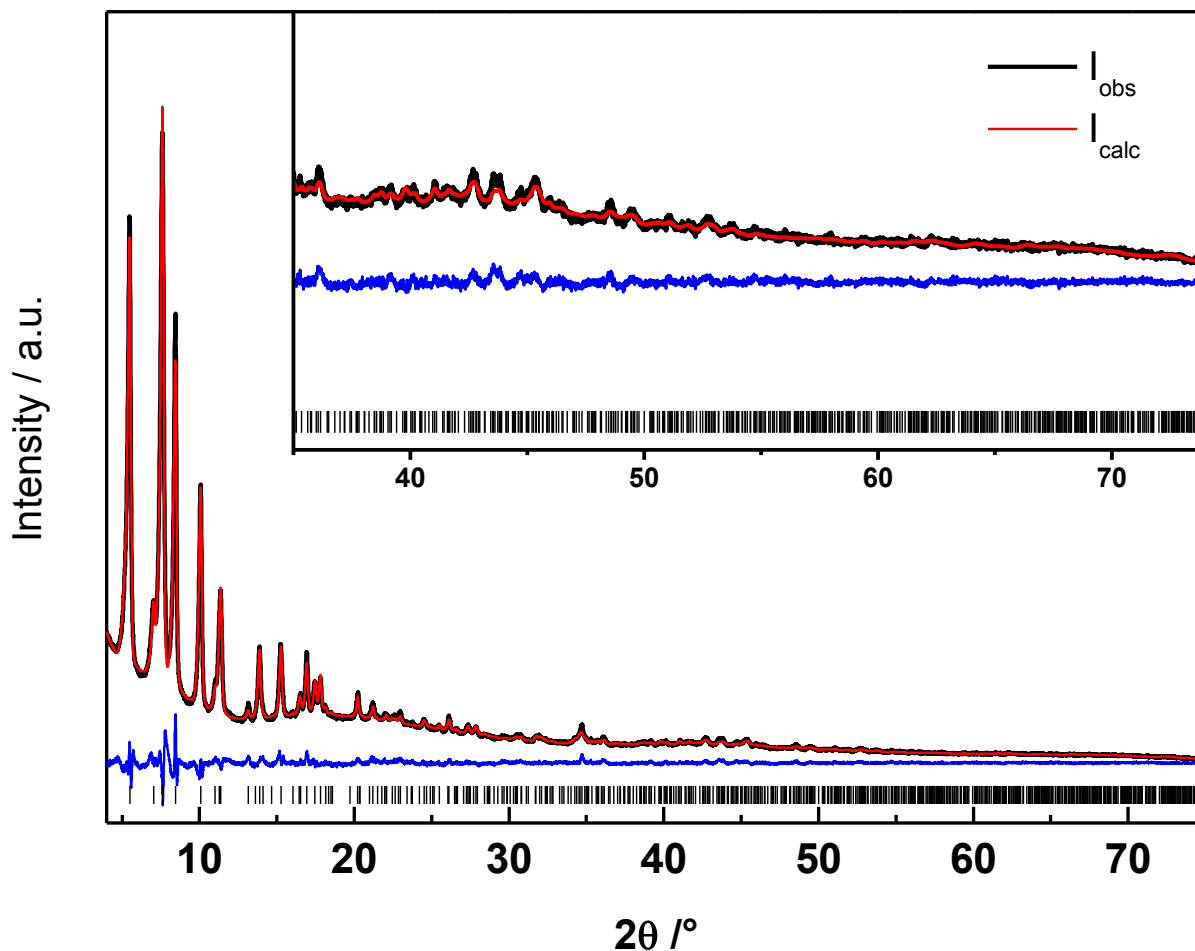

Figure S5: Final Rietveld plot of the refinement of CAU-3-BDC-NH<sub>2</sub>. The observed intensities are shown in black, the calculated intensities are shown in red. The difference curve is shown below in blue, vertical bars mark the Bragg positions. The insert shows a plot enlargement from 35 -75 °2θ.

Table S2: Selected bond lengths in CAU-3-BDC-NH<sub>2</sub> [Å].

| <i>Atom 1</i> | <i>Atom 2</i> | <i>d / Å</i> |           |    |         |
|---------------|---------------|--------------|-----------|----|---------|
| <b>A11</b>    | O1            | 1.99(2)      | <b>C3</b> | C3 | 1.39(3) |
|               | O2            | 1.80(2)      | <b>O2</b> | C4 | 1.39(5) |
|               | O3            | 1.74(2)      | <b>C4</b> | O2 | 1.39(3) |
|               | O4            | 1.87(3)      |           | C5 | 1.53(9) |
|               | O5            | 1.99(4)      | <b>C5</b> | C6 | 1.33(5) |
| <b>O1</b>     | C1            | 1.23(5)      | <b>N1</b> | C3 | 1.5 (1) |
| <b>C1</b>     | C2            | 1.60 (2)     | <b>N2</b> | C6 | 1.5(1)  |
| <b>C2</b>     | C3            | 1.38 (6)     |           |    |         |

Table S3: Atomic coordinates of CAU-3-NDC obtained from the force field calculations using Materials Studio 5.0.

| <i>Symbol</i> | <i>x/a</i> | <i>y/b</i> | <i>z/c</i> |
|---------------|------------|------------|------------|
| Fe1           | 0.25217    | 0.05104    | 0.51501    |
| O2            | 0.27995    | 0.07593    | 0.55811    |
| O3            | 0.32005    | 0.02894    | 0.51211    |
| O4            | 0.21924    | 0.01434    | 0.47145    |
| C5            | 0.26741    | 0.0306     | 0.44692    |
| C6            | 0.24497    | 0.90175    | 0.2889     |
| C7            | 0.24115    | 0.91213    | 0.32179    |
| C8            | 0.19049    | 0.86321    | 0.34061    |
| C9            | 0.14677    | 0.7935     | 0.29296    |
| C10           | 0.19805    | 0.84234    | 0.27414    |
| Fe11          | 0.0794     | 0.26015    | 0.48371    |
| O12           | 0.11136    | 0.28559    | 0.44055    |
| O13           | 0.06741    | 0.33477    | 0.4861     |
| O14           | 0.04232    | 0.23563    | 0.52706    |
| C15           | 0.05494    | 0.18882    | 0.54084    |
| C16           | 0.5384     | 0.61932    | 0.48658    |
| C17           | 0.47766    | 0.56072    | 0.48441    |
| C18           | 0.47197    | 0.50052    | 0.49396    |
| C19           | 0.58885    | 0.55858    | 0.50829    |
| C20           | 0.59464    | 0.61894    | 0.49844    |
| C21           | 0.29241    | 0.12878    | 0.57297    |
| O22           | 0.31378    | 0.14379    | 0.50389    |
| C23           | 0.34838    | 0.16804    | 0.47475    |
| O24           | 0.18921    | 0.08691    | 0.51862    |
| C25           | 0.15431    | 0.07905    | 0.54788    |
| C26           | 0.31919    | 0.97871    | 0.49943    |
| H27           | 0.31796    | 0.05445    | 0.456      |
| H28           | 0.26201    | 0.06152    | 0.42827    |
| H29           | 0.26215    | 0.9876     | 0.43382    |
| H30           | 0.28504    | 0.94023    | 0.27504    |
| H31           | 0.27804    | 0.9583     | 0.33253    |
| H32           | 0.11043    | 0.7473     | 0.28205    |
| H33           | 0.10738    | 0.20825    | 0.54132    |
| H34           | 0.03412    | 0.14329    | 0.52646    |
| H35           | 0.04152    | 0.18272    | 0.56665    |
| H36           | 0.54135    | 0.665      | 0.47882    |
| H37           | 0.43518    | 0.56247    | 0.47513    |
| H38           | 0.63177    | 0.55735    | 0.51734    |
| H39           | 0.31608    | 0.15723    | 0.45372    |
| H40           | 0.3848     | 0.15121    | 0.47182    |
| H41           | 0.3791     | 0.22248    | 0.47602    |
| H42           | 0.1003     | 0.04938    | 0.54346    |
| H43           | 0.16228    | 0.12602    | 0.55768    |
| H44           | 0.16881    | 0.05767    | 0.56752    |

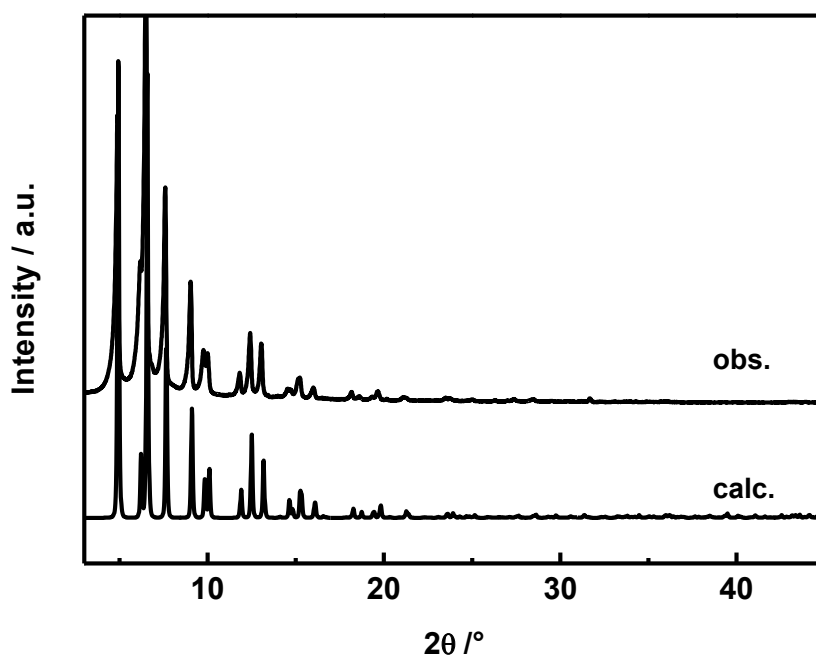

Figure S6: Calculated and observed powder pattern obtained from force field calculation.

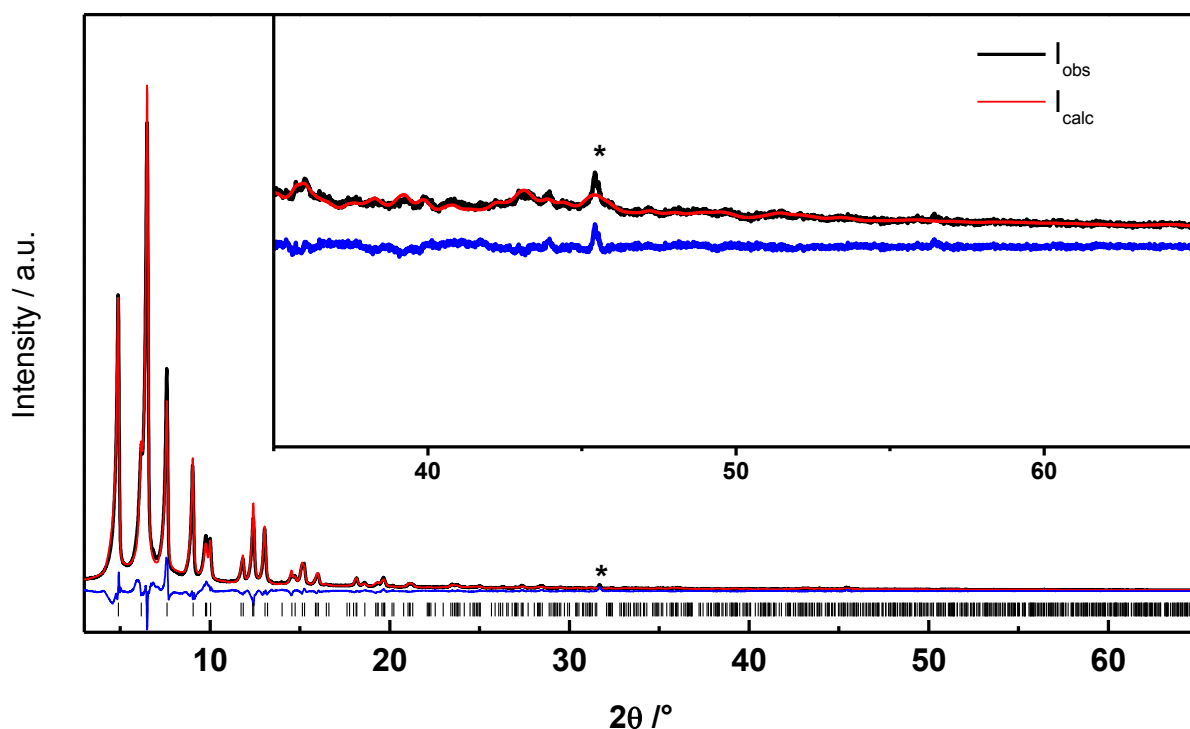

Figure S7: Final Rietveld plot of CAU-3-NDC. The asterisks correspond to NaCl as a by-product. The observed intensities are shown in black, the calculated intensities are shown in red. The difference curve is shown below in blue, vertical bars mark the Bragg positions. The insert shows a plot enlargement from 35 -65 °2θ.

Table S4: Selected bond lengths of CAU-3-NDC [Å]

| Atom 1 | Atom 2 | d /    | C3     | C4  | 1.4(3) |        |
|--------|--------|--------|--------|-----|--------|--------|
| Al1    | O1     | 1.8(2) | C4     | C5  | 1.3(3) |        |
|        | O4     | 1.8(2) | C5     | C5  | 1.3(4) |        |
|        | O5     | 1.9(2) |        | C6  | 1.5(6) |        |
|        | O6     | 1.9(2) | O3     | C7  | 1.2(3) |        |
|        | O7     | 1.8(1) | O4     | C7  | 1.2(2) |        |
|        | O8     | 2.0(3) | C7     | C8  | 1.5(2) |        |
|        | Al2    | O2     | 1.8(2) | C8  | C9     | 1.3(6) |
|        |        | O3     | 1.8(1) |     | C12    | 1.4(6) |
| O5     |        | 2.0(3) |        | C7  | 1.5(2) |        |
| O6     |        | 1.9(3) | C9     | C10 | 1.3(4) |        |
| O7     |        | 1.9(2) | C10    | C11 | 1.3(7) |        |
| O8     |        | 2.0(2) | C11    | C12 | 1.3(4) |        |
| O1     |        | C1     | 1.2(4) | O5  | C13    | 1.4(2) |
| O2     |        | C1     | 1.2(4) | O6  | C16    | 1.3(4) |
| C1     | C2     | 1.4(3) | O7     | C14 | 1.3(2) |        |
| C2     | C3     | 1.4(1) | O8     | C15 | 1.4(2) |        |
|        | C6     | 1.4(4) |        |     |        |        |

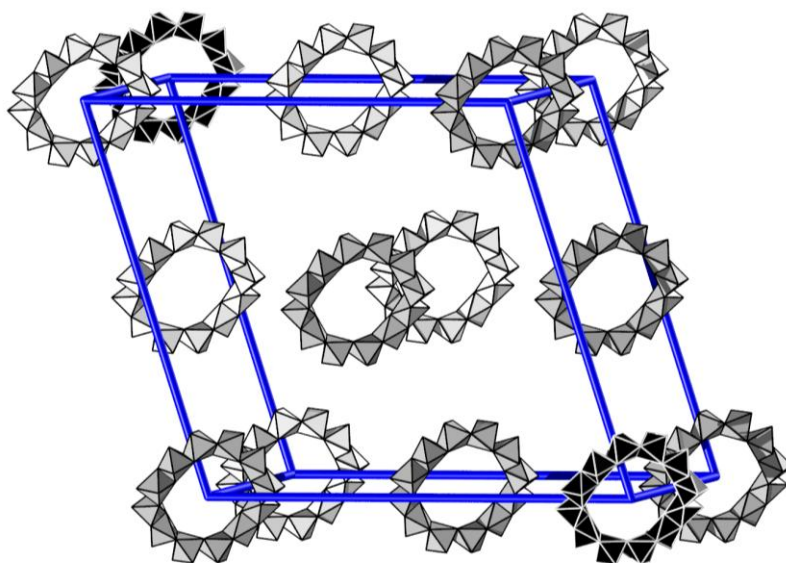

Figure S8: Pseudo-fcc-arrangement of the inorganic units. The colours emphasize the ABC-stacking.

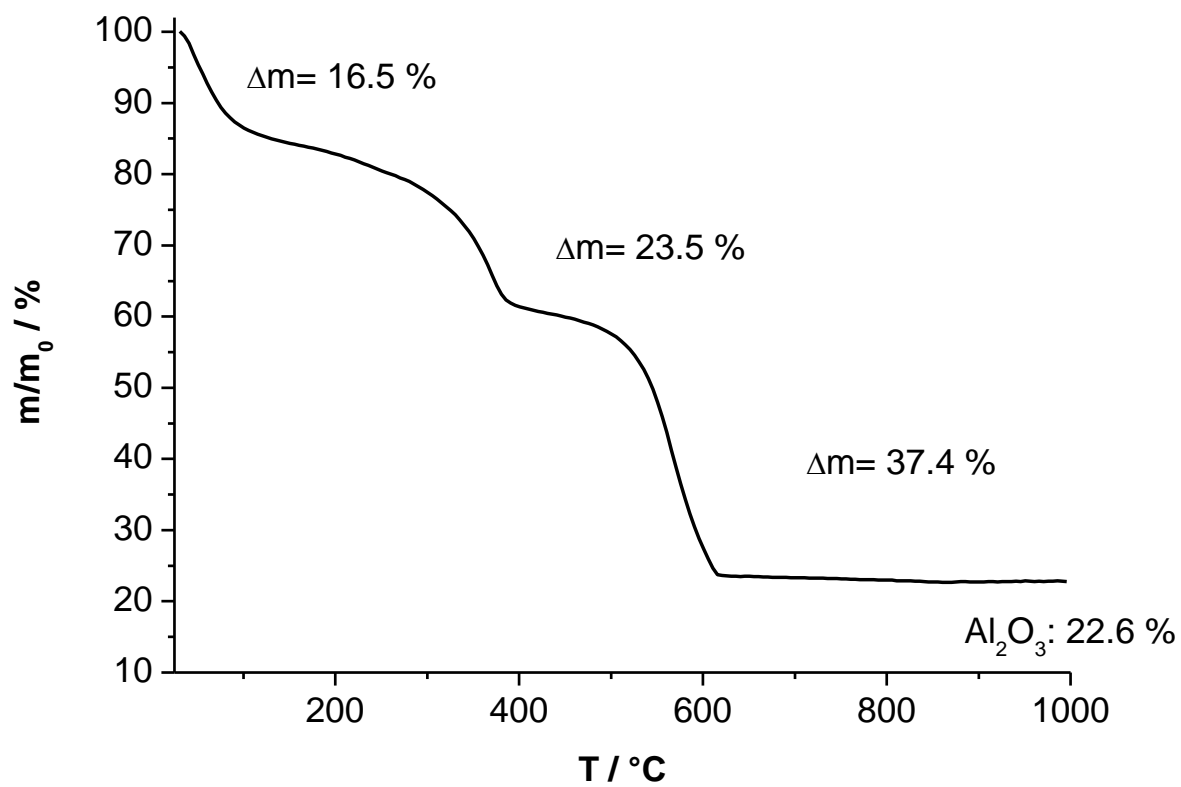

Fig. S9: TG-curve for CAU-3-BDC (**1**).

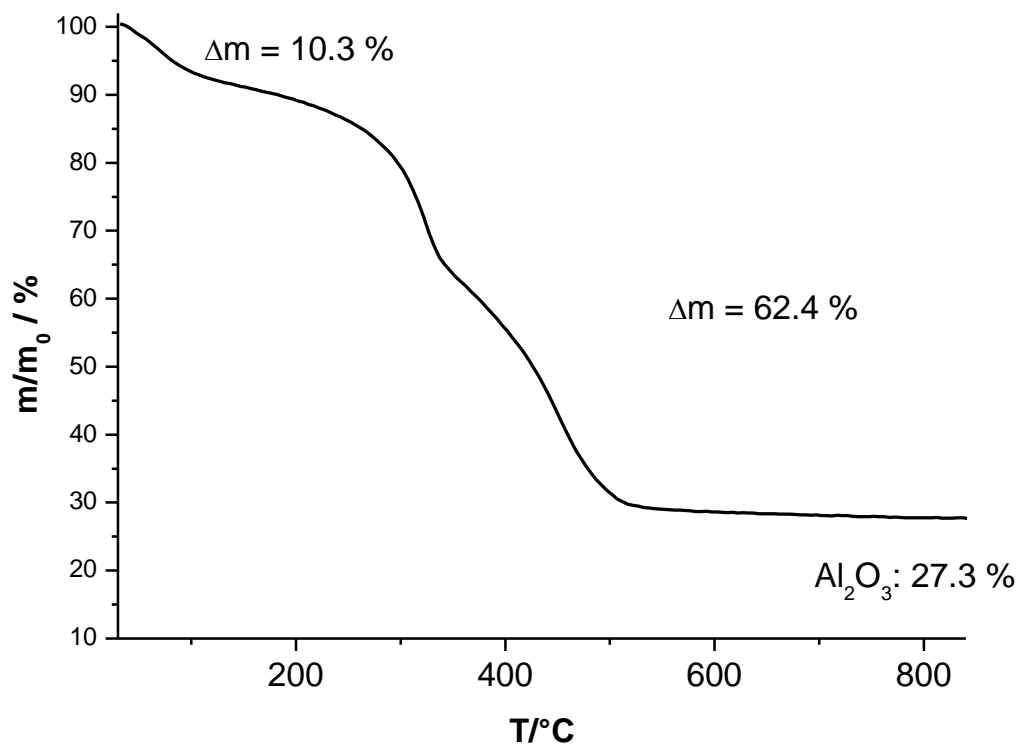

Figure S10. TG-diagram of the decomposition of CAU-3-BDC-NH<sub>2</sub> (2).

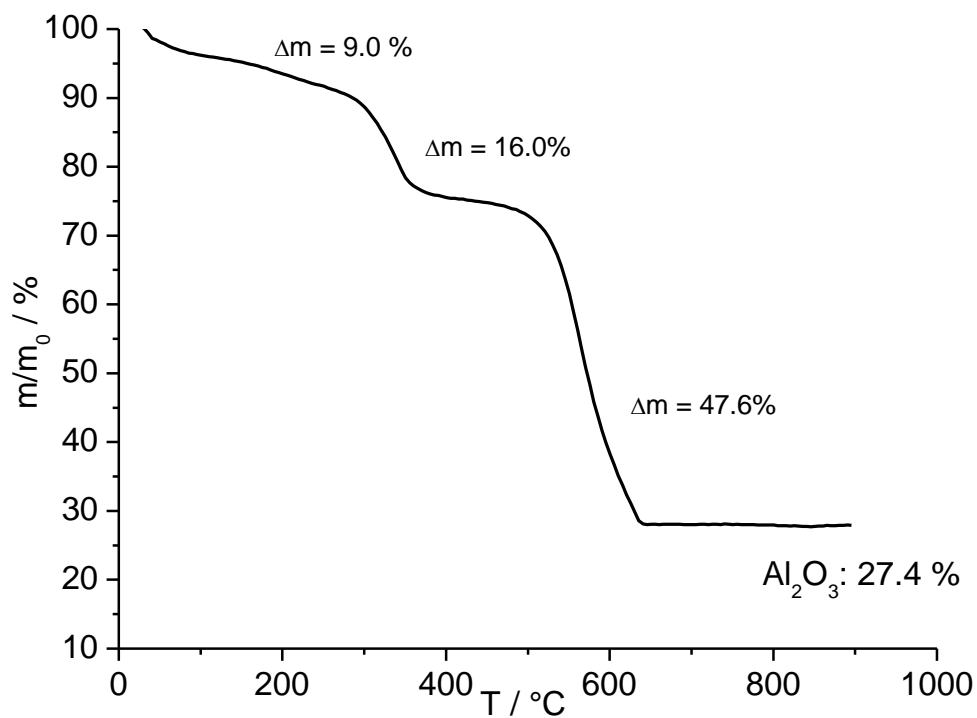

Figure S11. TG-diagram of the decomposition of CAU-3-NDC (3).



Table S5: Exact amounts of starting materials used in the discovery of CAU-3-BDC.

| Reaktor No. | molar ratio H <sub>2</sub> BDC | molar ratio AlCl <sub>3</sub> *6H <sub>2</sub> O | molar ratio NaOH | amount H <sub>2</sub> BDC [μmol] | amount AlCl <sub>3</sub> *6H <sub>2</sub> O [μmol] | amount NaOH [μmol] | mass H <sub>2</sub> BDC [mg] | mass AlCl <sub>3</sub> *6H <sub>2</sub> O [mg] | volume NaOH [μL] | volume MeOH [μL] |
|-------------|--------------------------------|--------------------------------------------------|------------------|----------------------------------|----------------------------------------------------|--------------------|------------------------------|------------------------------------------------|------------------|------------------|
| 1           | 0,25                           | 1                                                | 0,5              | 32                               | 128                                                | 64                 | 5                            | 31                                             | 32               | 1368             |
| 2           | 0,25                           | 1                                                | 0,75             | 32                               | 128                                                | 96                 | 5                            | 31                                             | 48               | 1352             |
| 3           | 0,25                           | 1                                                | 1,25             | 32                               | 128                                                | 160                | 5                            | 31                                             | 80               | 1320             |
| 4           | 0,25                           | 1                                                | 1,5              | 32                               | 128                                                | 192                | 5                            | 31                                             | 96               | 1304             |
| 5           | 0,25                           | 1                                                | 1,75             | 32                               | 128                                                | 224                | 5                            | 31                                             | 112              | 1288             |
| 6           | 0,25                           | 1                                                | 2                | 32                               | 128                                                | 256                | 5                            | 31                                             | 128              | 1272             |
| 7           | 0,25                           | 1                                                | 1                | 32                               | 128                                                | 130                | 5                            | 31                                             | 65               | 935              |
| 8           | 0,25                           | 1                                                | 1                | 32                               | 128                                                | 130                | 5                            | 31                                             | 65               | 1185             |
| 9           | 0,25                           | 1                                                | 1                | 32                               | 128                                                | 130                | 5                            | 31                                             | 65               | 1435             |
| 10          | 0,50                           | 2                                                | 2                | 64                               | 256                                                | 260                | 11                           | 62                                             | 130              | 870              |
| 11          | 0,50                           | 2                                                | 2                | 64                               | 256                                                | 260                | 11                           | 62                                             | 130              | 1120             |
| 12          | 0,50                           | 2                                                | 2                | 64                               | 256                                                | 260                | 11                           | 62                                             | 130              | 1370             |
| 13          | 0,50                           | 2                                                | 1                | 64                               | 256                                                | 128                | 11                           | 62                                             | 64               | 1336             |
| 14          | 0,50                           | 2                                                | 1,25             | 64                               | 256                                                | 160                | 11                           | 62                                             | 80               | 1320             |
| 15          | 0,50                           | 2                                                | 1,50             | 64                               | 256                                                | 192                | 11                           | 62                                             | 96               | 1304             |
| 16          | 0,50                           | 2                                                | 1,75             | 64                               | 256                                                | 224                | 11                           | 62                                             | 112              | 1288             |
| 17          | 0,50                           | 2                                                | 2                | 64                               | 256                                                | 256                | 11                           | 62                                             | 128              | 1272             |
| 18          | 0,50                           | 2                                                | 2,5              | 64                               | 256                                                | 320                | 11                           | 62                                             | 160              | 1240             |
| 19          | 1                              | 4                                                | 1,55             | 128                              | 512                                                | 198                | 21                           | 124                                            | 99               | 1301             |
| 20          | 1                              | 4                                                | 2,18             | 128                              | 512                                                | 279                | 21                           | 124                                            | 140              | 1260             |
| 21          | 1                              | 4                                                | 2,81             | 128                              | 512                                                | 360                | 21                           | 124                                            | 180              | 1220             |
| 22          | 1                              | 4                                                | 3,43             | 128                              | 512                                                | 439                | 21                           | 124                                            | 220              | 1180             |
| 23          | 1                              | 4                                                | 4,06             | 128                              | 512                                                | 520                | 21                           | 124                                            | 260              | 1140             |
| 24          | 1                              | 4                                                | 4,68             | 128                              | 512                                                | 599                | 21                           | 124                                            | 300              | 1100             |
